# Supplementary material
Source: publisher figshare collection journal article supplement (https://sage.figshare.com/ndownloader/files/21239859)
Supplement: Supplementary file 1 [file 21239859]

## **Supplemental File C: Alphabet Stimuli**

### **Alphabet and phonics test stimuli**

Part 1: Stimuli are presented for Q1 and then each question thereafter, until each question has been asked or the stop rules have ended the test. The experimenter asks the child to give them the underlined symbol using the letter name (e.g. 'give me B'). Stop rules: after three consecutive incorrect answers (to include not answering), the test ends.

Part 2: For each question in part 1 that was not correctly answered, present the stimuli again and ask for the phonics name (i.e. give me 'b'). Same stop rules as above apply.

Correct answer is underlined, other two stimuli are distractors

| Question | Left     | Centre   | Right    |
|----------|----------|----------|----------|
| 1        | a        | s        | l        |
| 2        | <u>a</u> | q        | t        |
| 4        | o        | <u>b</u> | z        |
| 3        | e        | p        | <u>r</u> |
| 5        | r        | p        | <u>k</u> |
| 6        | <u>s</u> | e        | t        |
| 8        | a        | <u>w</u> | t        |
| 9        | <u>c</u> | n        | i        |
| 10       | <u>f</u> | o        | m        |
| 12       | x        | <u>n</u> | a        |
| 14       | i        | p        | <u>t</u> |
| 15       | p        | i        | e        |

|    |          |          |          |
|----|----------|----------|----------|
| 16 | <u>e</u> | t        | j        |
| 18 | i        | n        | g        |
| 19 | h        | f        | <u>o</u> |
| 24 | h        | <u>u</u> | c        |

NB: Abridged from original test of the full alphabet
